# Supplementary material for: Choline Regulates SOX4 through miR-129-5p and Modifies H3K27me3 in the Developing Cortex
Source: MDPI journal article supplement (doi:10.3390/nu15122774), 2023-06-16
Supplement: s1 [file s1]

## 1. Supplementary Materials

| Product number       | Low Choline<br>D16040705 |             | Medium Choline<br>D16040703 |             | High Choline<br>D16040706 |             |
|----------------------|--------------------------|-------------|-----------------------------|-------------|---------------------------|-------------|
|                      | gm%                      | kcal%       | gm%                         | kcal%       | gm%                       | kcal%       |
| Protein              | 21                       | 20          | 21                          | 20          | 21                        | 21          |
| Carbohydrate         | 64                       | 64          | 64                          | 64          | 63                        | 64          |
| Fat                  | 7                        | 16          | 7                           | 16          | 7                         | 16          |
| Total                |                          | 100         |                             | 100         |                           | 100         |
| kcal/gm              | 4                        |             | 4                           |             | 4                         |             |
|                      |                          |             |                             |             |                           |             |
| Ingredient           | gm                       | kcal        | gm                          | kcal        | gm                        | kcal        |
| Casein               | 0                        | 0           | 0                           | 0           | 0                         | 0           |
| Isolated Soy Protein | 200                      | 800         | 200                         | 800         | 200                       | 800         |
| L-Cystine            | 5.08                     | 20          | 2.54                        | 10          | 2.54                      | 10          |
| L-Methionine         |                          |             | 2.54                        | 10          | 2.54                      | 10          |
|                      |                          |             |                             |             |                           |             |
| Corn Starch          | 397.906                  | 1592        | 396.506                     | 1586        | 391.606                   | 1566        |
| Maltodextrin 10      | 132                      | 528         | 132                         | 528         | 132                       | 528         |
| Sucrose              | 100                      | 400         | 100                         | 400         | 100                       | 400         |
|                      |                          |             |                             |             |                           |             |
| Cellulose, BW200     | 50                       | 0           | 50                          | 0           | 50                        | 0           |
|                      |                          |             |                             |             |                           |             |
| Soybean Oil          | 70                       | 630         | 70                          | 630         | 70                        | 630         |
| t-Butylhydroquinone  | 0.014                    | 0           | 0.014                       | 0           | 0.014                     | 0           |
|                      |                          |             |                             |             |                           |             |
| Mineral Mix S10022G  | 35                       | 0           | 35                          | 0           | 35                        | 0           |
|                      |                          |             |                             |             |                           |             |
| Vitamin Mix V10037   | 10                       | 40          | 10                          | 40          | 10                        | 40          |
| Choline Chloride     | 0                        | 0           | 1.4                         | 0           | 6.3                       | 0           |
|                      |                          |             |                             |             |                           |             |
| Choline Bitartrate   | 0                        | 0           | 0                           | 0           | 0                         | 0           |
|                      |                          |             |                             |             |                           |             |
| FD&C Blue Dye #1     | 0                        | 0           | 0                           | 0           | 0                         | 0           |
| FD&C Yellow Dye #5   | 0                        | 0           | 0                           | 0           | 0                         | 0           |
| FD&C Red Dye #40     | 0                        | 0           | 0                           | 0           | 0                         | 0           |
|                      |                          |             |                             |             |                           |             |
|                      |                          |             |                             |             |                           |             |
| <b>Total</b>         | <b>1000</b>              | <b>4010</b> | <b>1000</b>                 | <b>4004</b> | <b>1000</b>               | <b>3985</b> |

**Table S1.** Diet composition for low, medium, and high choline.

| Primer                                   | Sequence                     |
|------------------------------------------|------------------------------|
| <i>B-Actin</i> (PrimerBank: ID6671509a1) | FWD: GGCTGTATTCCCCTCCATCG    |
|                                          | REV: CCAGTTGGTAACAATGCCATGT  |
| <i>Ezh2</i> (PrimerBank: ID26353604a1)   | FWD: AGTGACTTGGATTTTCCAGCAC  |
|                                          | REV: AATTCTGTTGTAAGGGCGACC   |
| <i>Sdcbp</i> (PrimerBank: ID7949150a1)   | FWD: CACCAGCACAAGGGTTGGTAG   |
|                                          | REV: GCCTGGACGAGTTGAACAAAT   |
| <i>Sox4</i> (PrimerBank: ID6678073a1)    | FWD: CGGCTGCATCGTTCTCTCC     |
|                                          | REV: GGTAGACGTGCTTCACTTTCTTG |
| <i>Tbt</i> (PrimerBank: ID8850234a1)     | FWD: AGAACAATCCAGACTAGCAGCA  |
|                                          | REV: GGGAACCTTCACATCACAGCTC  |

**Table S2.** Primer sequences used RT-PCR Analysis.

A)

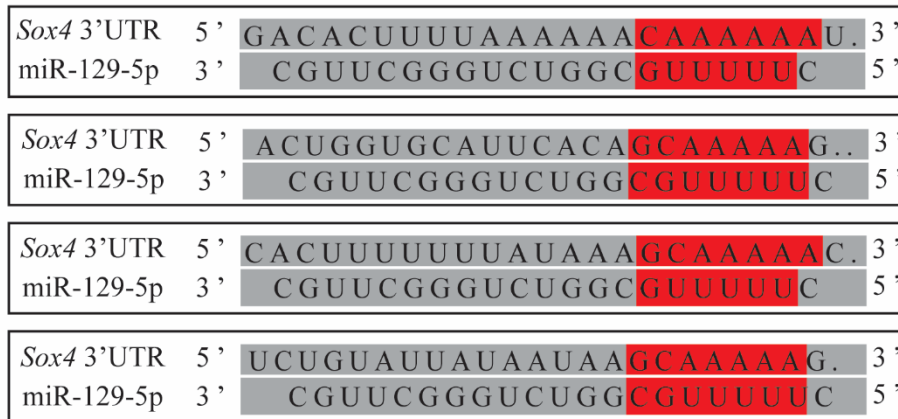

B)

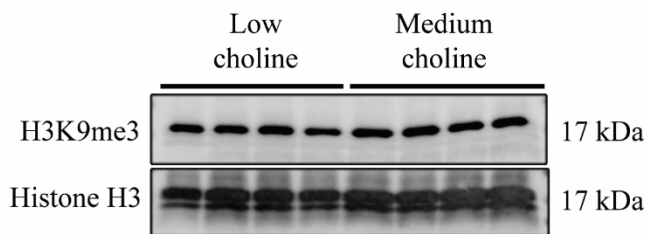

C)

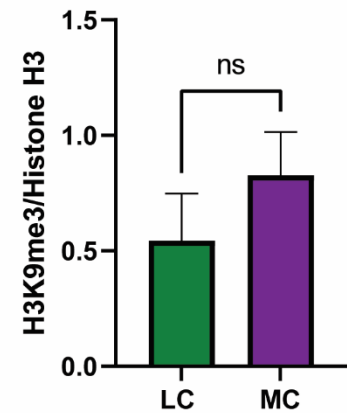

**Figure S1.** A) In silico prediction of miR-129-5p binding sites with *Sox3* 3'UTR in red. Dams were placed on either a LC or MC diet from E11.5 to E17.5. B) Cerebral cortex of E17.5 embryos were dissociated to extract total histones. Cell lysates were analyzed by western blot with antibodies to H3K9me3 and Total Histone 3 (H3). We did not observe changes in the global protein levels of H3K9me3 when comparing LC vs MC. C) Quantifications of protein levels are normalized to H3 and presented as fold change. (n= 4 dams; 1 pup per dam) (ns: not significant; p=0.3639). Data are mean ± SEM. Data was tested for normality by Brown-Forsythe test and statistical analysis was performed using an unpaired t-test.

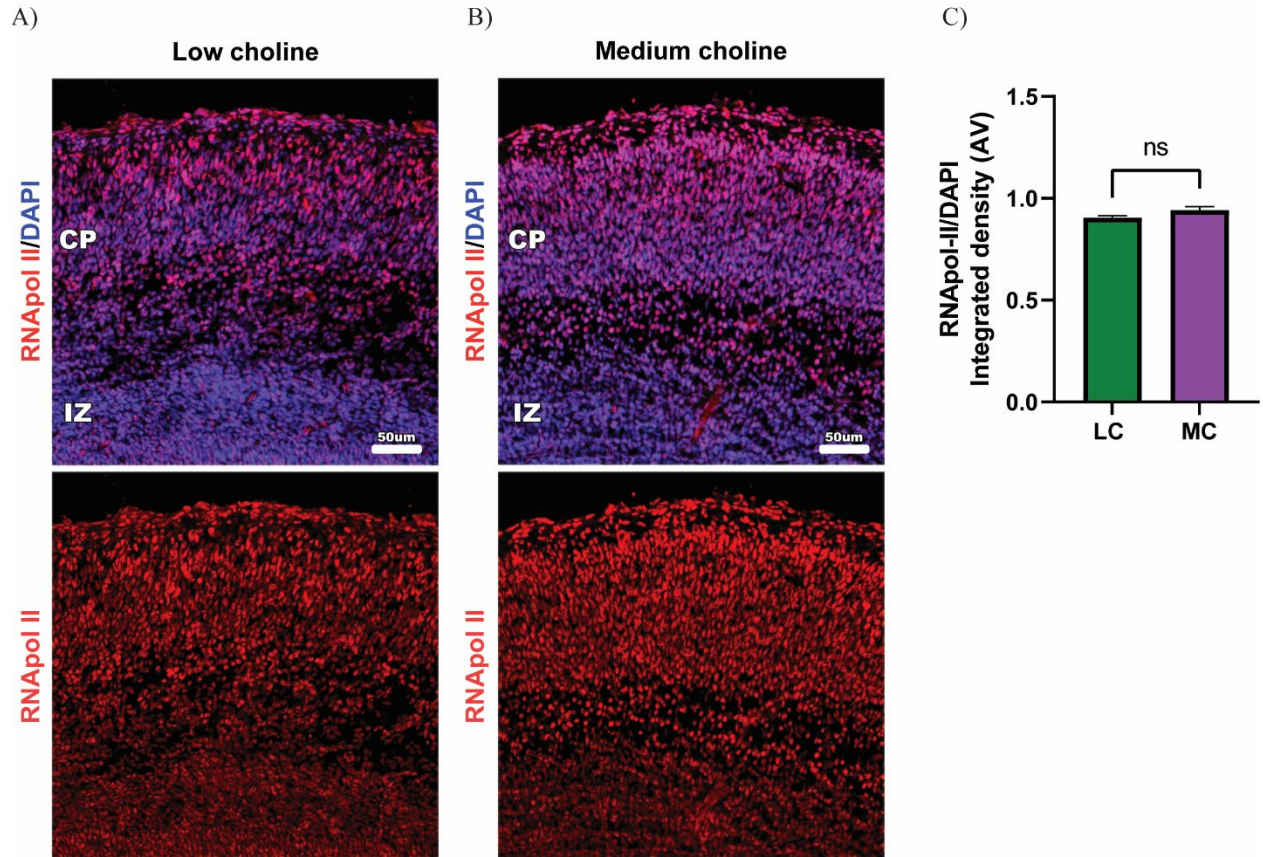

**Figure S2.** Choline availability does not alter global transcription in the developing brain. Dams were placed on either a LC or MC diet from E11.5 to E17.5. A-B) Representative immunostaining from an E17.5 cerebral cortex exposed to LC or MC. These brains do not exhibit changes in global transcription. C) Quantification of RNA pol II protein levels was performed in LC and MC by detection of immunofluorescence (n=4-5 dams per condition, 1 pup per dam) (ns: not significant; p=0.0974). Data are mean  $\pm$  SEM. All data was tested for normality by Brown-Forsythe test and statistical analysis was performed using an unpaired t-test.

# Mus musculus (GRCm39) Mouse miR129-1

Chromosome 6: 29,022,618 – 29,022,690  
Transcript ID: ENSMUST00000083535.3  
Length: 73 bp ncRNA

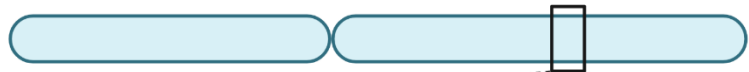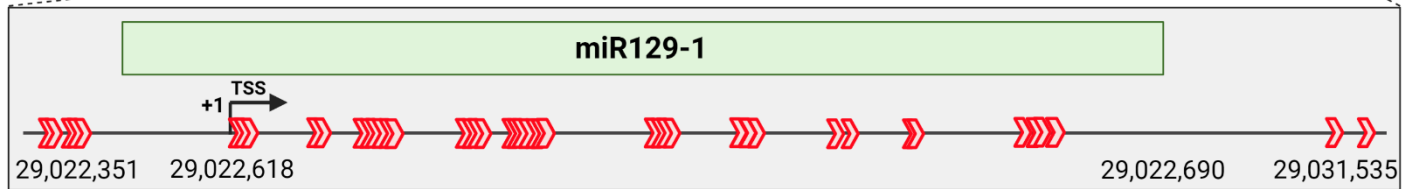

» CpG site analyzed

| Location     | From TSS<br>(ENSMUST00000083535.3) | CpGs | GRCm39        | CpG<br>location | Mean % methylation<br>(n=4 per group) |       | P<br>value |
|--------------|------------------------------------|------|---------------|-----------------|---------------------------------------|-------|------------|
|              |                                    |      |               |                 | LC                                    | MC    |            |
| 5-Upstream   | -267 to -189                       | 5    | Chr6:29022351 | -267            | 89.43                                 | 88.88 | 0.1056     |
|              |                                    |      | Chr6:29022370 | -248            | 92.50                                 | 93.23 | 0.2257     |
|              |                                    |      | Chr6:29022405 | -213            | 89.25                                 | 89.80 | 0.6929     |
|              |                                    |      | Chr6:29022414 | -204            | 63.68                                 | 62.78 | 0.6460     |
|              |                                    |      | Chr6:29022429 | -189            | 90.45                                 | 89.05 | 0.4653     |
| Exon 1       | +13 to +35                         | 3    | Chr6:29022630 | +13             | 91.05                                 | 89.78 | 0.6342     |
|              |                                    |      | Chr6:29022652 | +35             | 85.10                                 | 85.85 | 0.8048     |
|              |                                    |      | Chr6:29022691 | +74             | 95.33                                 | 95.45 | 0.9551     |
| 3-Downstream | +664 to +687                       | 2    | Chr6:29023281 | +664            | 68.85                                 | 69.50 | 0.3143     |
|              |                                    |      | Chr6:29023304 | +687            | 61.55                                 | 63.23 | 0.8857     |
| 3-Downstream | +867 to +985                       | 6    | Chr6:29023484 | +867            | 7.37                                  | 12.53 | 0.0559     |
|              |                                    |      | Chr6:29023501 | +884            | 19.45                                 | 14.03 | 0.4119     |
|              |                                    |      | Chr6:29023519 | +902            | 42.95                                 | 40.75 | 0.6063     |
|              |                                    |      | Chr6:29023542 | +925            | 42.20                                 | 36.35 | 0.2330     |
|              |                                    |      | Chr6:29023567 | +950            | 44.55                                 | 48.93 | 0.4483     |
|              |                                    |      | Chr6:29023602 | +985            | 22.08                                 | 19.40 | 0.7868     |
| 3-Downstream | +1400 to +1447                     | 4    | Chr6:29024017 | +1400           | 40.38                                 | 40.78 | 0.7692     |
|              |                                    |      | Chr6:29024034 | +1417           | 26.83                                 | 27.28 | 0.8253     |
|              |                                    |      | Chr6:29024037 | +1420           | 24.23                                 | 23.60 | 0.5906     |
|              |                                    |      | Chr6:29024064 | +1447           | 33.00                                 | 31.70 | 0.3388     |
| 3-Downstream | +1687 to +1741                     | 7    | Chr6:29024304 | +1687           | 1.65                                  | 2.22  | 0.4041     |
|              |                                    |      | Chr6:29024318 | +1701           | 0.22                                  | 0.90  | 0.2289     |
|              |                                    |      | Chr6:29024328 | +1711           | 0.40                                  | 0.27  | 0.6803     |
|              |                                    |      | Chr6:29024335 | +1718           | 0.50                                  | 0.55  | 0.9013     |
|              |                                    |      | Chr6:29024348 | +1731           | 0.22                                  | 0.65  | 0.2597     |
|              |                                    |      | Chr6:29024354 | +1737           | 0.00                                  | 0.57  | 0.1871     |
|              |                                    |      | Chr6:29024358 | +1741           | 0.57                                  | 0.25  | 0.2838     |
| 3-Downstream | +2441 to +2502                     | 4    | Chr6:29025058 | +2441           | 85.06                                 | 84.75 | 0.6905     |
|              |                                    |      | Chr6:29025091 | +2474           | 84.85                                 | 82.63 | 0.3429     |

|              |                |   |               |       |       |       |        |
|--------------|----------------|---|---------------|-------|-------|-------|--------|
|              |                |   | Chr6:29025112 | +2495 | 91.90 | 92.15 | 0.7993 |
|              |                |   | Chr6:29025119 | +2502 | 93.20 | 91.68 | 0.2298 |
| 3-Downstream | +3683 to +3724 | 3 | Chr6:29026300 | +3683 | 78.30 | 78.25 | 0.9498 |
|              |                |   | Chr6:29026305 | +3688 | 83.58 | 83.00 | 0.1046 |
|              |                |   | Chr6:29026341 | +3724 | 41.63 | 40.35 | 0.4321 |
| 3-Downstream | +4280 to +4334 | 2 | Chr6:29026897 | +4280 | 71.95 | 69.08 | 0.2312 |
|              |                |   | Chr6:29026951 | +4334 | 21.75 | 21.18 | 0.2526 |
| 3-Downstream | +4552 to +4576 | 2 | Chr6:29027169 | +4552 | 64.23 | 64.08 | 0.8915 |
|              |                |   | Chr6:29027193 | +4576 | 61.95 | 60.38 | 0.4875 |
| 3-Downstream | +6350 to +6444 | 4 | Chr6:29028967 | +6350 | 92.70 | 92.13 | 0.6403 |
|              |                |   | Chr6:29028996 | +6379 | 93.98 | 92.85 | 0.5207 |
|              |                |   | Chr6:29029033 | +6416 | 93.60 | 91.10 | 0.046* |
|              |                |   | Chr6:29029061 | +6444 | 79.78 | 79.28 | 0.6875 |
| 3-Downstream | +8832 to +8918 | 4 | Chr6:29031449 | +8832 | 1.75  | 1.72  | 0.9799 |
|              |                |   | Chr6:29031457 | +8840 | 8.20  | 0.18  | 0.9890 |
|              |                |   | Chr6:29031463 | +8846 | 13.70 | 13.65 | 0.9650 |
|              |                |   | Chr6:29031535 | +8918 | 9.57  | 10.48 | 0.6724 |

**Table S3.** Analysis of CpG methylation of the Mir129-1 gene does not exhibit changes when comparing LC vs. MC. Cortical NPCs were cultured in either LC (5 $\mu$ M) or MC (70 $\mu$ M) for 48 hours and subjected to bisulfite conversion to evaluate methylation. A total of 46 methylation sites in the sequence 29,022,618 to 29,022,690 in chromosome 6 were analyzed, 5 CpGs 5'Downstream, 3 within Exon-1 and 38 in the 3' Downstream region. The CpG site Chr6:29029033 (+6416) is statistically significant (p=0.046, t-test); however, the overall percentage of methylation between the two groups does not represent a significant change.

# *Mus musculus* (GRCm39) Mouse miR129-2

Chromosome 2: 94,071,709 – 94,071,798  
Transcript ID: ENSMUST00000083577.3  
Length: 90 bp ncRNA

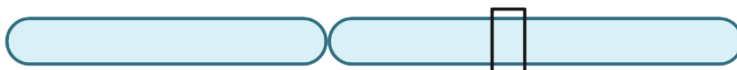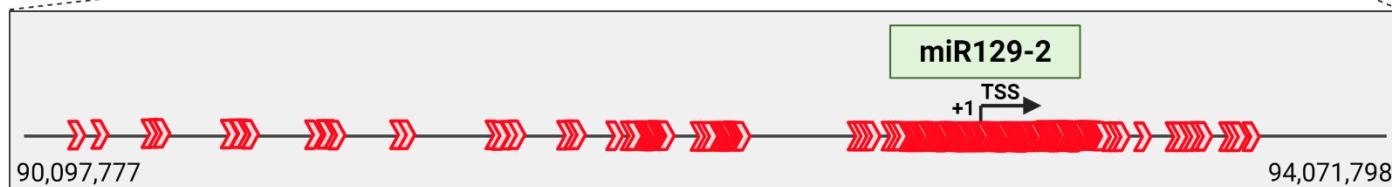

» CpG site analyzed

| Location   | From TSS<br>(ENSMUST00000129661.3) | CpGs | GRCm39        | CpG<br>location | Mean % methylation<br>(n=4 per group) |       | p<br>value |
|------------|------------------------------------|------|---------------|-----------------|---------------------------------------|-------|------------|
|            |                                    |      |               |                 | LC                                    | MC    |            |
| 5-Upstream | -2403 to -2364                     | 2    | Chr2:94097777 | -2403           | 6.75                                  | 6.77  | 0.9645     |
|            |                                    |      | Chr2:94097738 | -2364           | 13.90                                 | 13.33 | 0.7056     |
| 5-Upstream | -1996 to -1931                     | 3    | Chr2:94097777 | -1996           | 58.87                                 | 53.50 | 0.1328     |
|            |                                    |      | Chr2:94097738 | -1968           | 35.37                                 | 32.80 | 0.7140     |
|            |                                    |      | Chr2:94097370 | -1931           | 23.30                                 | 23.10 | 0.9754     |
| 5-Upstream | -149 to -56                        | 4    | Chr2:94097342 | -149            | 1.20                                  | 0.60  | 0.4825     |
|            |                                    |      | Chr2:94097305 | -93             | 1.25                                  | 0.20  | 0.3369     |
|            |                                    |      | Chr2:94095523 | -86             | 1.07                                  | 0.23  | 0.3159     |
|            |                                    |      | Chr2:94095467 | -56             | 2.02                                  | 0.48  | 0.1249     |
| Intron 1   | +1283 to +1350                     | 7    | Chr2:94095460 | +1283           | 1.70                                  | 1.40  | 0.8795     |
|            |                                    |      | Chr2:94095430 | +1297           | 2.27                                  | 1.27  | 0.5891     |
|            |                                    |      | Chr2:94094092 | +1303           | 6.37                                  | 0.95  | 0.3651     |
|            |                                    |      | Chr2:94094078 | +1305           | 1.62                                  | 0.67  | 0.4411     |
|            |                                    |      | Chr2:94094072 | +1311           | 1.97                                  | 0.60  | 0.3648     |
|            |                                    |      | Chr2:94094070 | +1317           | 1.87                                  | 1.10  | 0.5569     |
| 5-Upstream | -6131 to -6067                     | 3    | Chr2:94094064 | +1350           | 2.10                                  | 0.65  | 0.3590     |
|            |                                    |      | Chr2:94094058 | -6131           | 4.05                                  | 6.07  | 0.1455     |
|            |                                    |      | Chr2:94094025 | -6071           | 20.20                                 | 21.60 | 0.6370     |
| 5-Upstream | -5674 to -5647                     | 4    | Chr2:94077929 | -6067           | 5.33                                  | 9.26  | 0.2192     |
|            |                                    |      | Chr2:94077869 | -5674           | 0.80                                  | 0.75  | 0.9425     |
|            |                                    |      | Chr2:94077865 | -5669           | 1.35                                  | 1.05  | 0.6447     |
|            |                                    |      | Chr2:94077472 | -5662           | 1.02                                  | 1.07  | 0.9478     |
| 5-Upstream | -4942 to -4863                     | 4    | Chr2:94077467 | -5647           | 1.75                                  | 1.35  | 0.3112     |
|            |                                    |      | Chr2:94077460 | -4942           | 54.85                                 | 49.95 | 0.3138     |
|            |                                    |      | Chr2:94077445 | -4903           | 53.30                                 | 45.15 | 0.1925     |
|            |                                    |      | Chr2:94076740 | -4871           | 11.58                                 | 14.03 | 0.1405     |
| 5-Upstream | -4150 to -4050                     | 4    | Chr2:94076701 | -4863           | 33.53                                 | 29.65 | 0.1885     |
|            |                                    |      | Chr2:94076669 | -4150           | 4.60                                  | 4.20  | 0.5501     |
|            |                                    |      | Chr2:94076661 | -4101           | 3.27                                  | 2.22  | 0.1133     |

|            |                |    |               |       |       |       |        |
|------------|----------------|----|---------------|-------|-------|-------|--------|
|            |                |    | Chr2:94075948 | -4072 | 4.67  | 4.00  | 0.0825 |
|            |                |    | Chr2:94075899 | -4051 | 3.15  | 2.25  | 0.2507 |
| 5-Upstream | -3845 to -3816 | 3  | Chr2:94075870 | -3845 | 66.48 | 65.10 | 0.2854 |
|            |                |    | Chr2:94075849 | -3841 | 91.65 | 91.65 | 0.9999 |
|            |                |    | Chr2:94075643 | -3816 | 51.78 | 53.15 | 0.2598 |
|            |                |    |               |       |       |       |        |
| 5-Upstream | -3134 to -3043 | 5  | Chr2:94075639 | -3134 | 96.80 | 96.03 | 0.2714 |
|            |                |    | Chr2:94075614 | -3117 | 22.55 | 23.68 | 0.2608 |
|            |                |    | Chr2:94074932 | -3086 | 60.45 | 61.58 | 0.3061 |
|            |                |    | Chr2:94074915 | -3048 | 58.80 | 58.43 | 0.1764 |
|            |                |    | Chr2:94074884 | -3043 | 55.45 | 52.28 | 0.0600 |
| 5-Upstream | -2619 to -2594 | 3  | Chr2:94074846 | -2619 | 12.45 | 11.38 | 0.2855 |
|            |                |    | Chr2:94074841 | -2611 | 55.50 | 17.70 | 0.0518 |
|            |                |    | Chr2:94074417 | -2594 | 56.95 | 55.00 | 0.0838 |
| 5-Upstream | -415 to -379   | 3  | Chr2:94074409 | -415  | 10.75 | 9.00  | 0.1085 |
|            |                |    | Chr2:94074392 | -399  | 9.07  | 9.82  | 0.7053 |
|            |                |    | Chr2:94072213 | -379  | 4.00  | 3.75  | 0.6711 |
| 5-Upstream | -316 to -199   | 7  | Chr2:94072197 | -316  | 3.92  | 3.97  | 0.9690 |
|            |                |    | Chr2:94072177 | -295  | 7.65  | 7.25  | 0.8452 |
|            |                |    | Chr2:94072114 | -265  | 1.25  | 0.72  | 0.4677 |
|            |                |    | Chr2:94072093 | -252  | 3.20  | 2.82  | 0.8301 |
|            |                |    | Chr2:94072063 | -238  | 5.82  | 6.10  | 0.8915 |
|            |                |    | Chr2:94072050 | -220  | 3.12  | 3.50  | 0.7670 |
|            |                |    | Chr2:94072036 | -199  | 2.57  | 1.20  | 0.2274 |
| 5-Upstream | -160 to -78    | 12 | Chr2:94072018 | -160  | 1.75  | 1.82  | 0.7045 |
|            |                |    | Chr2:94071997 | -158  | 0.90  | 1.22  | 0.2838 |
|            |                |    | Chr2:94071958 | -144  | 2.50  | 2.27  | 0.2665 |
|            |                |    | Chr2:94071956 | -141  | 1.60  | 1.32  | 0.6697 |
|            |                |    | Chr2:94071942 | -139  | 1.57  | 1.32  | 0.3198 |
|            |                |    | Chr2:94071939 | -118  | 0.92  | 1.22  | 0.6283 |
|            |                |    | Chr2:94071937 | -116  | 1.32  | 1.62  | 0.1343 |
|            |                |    | Chr2:94071916 | -108  | 2.22  | 2.77  | 0.2810 |
|            |                |    | Chr2:94071914 | -106  | 2.07  | 2.20  | 0.8603 |
|            |                |    | Chr2:94071906 | -103  | 2.62  | 2.52  | 0.8679 |
|            |                |    | Chr2:94071904 | -84   | 2.57  | 2.52  | 0.9096 |
|            |                |    | Chr2:94071901 | -78   | 2.22  | 3.65  | 0.0582 |
| 5-Upstream | -49 to -9      | 11 | Chr2:94071882 | -49   | 3.32  | 3.05  | 0.5419 |
|            |                |    | Chr2:94071876 | -46   | 3.40  | 3.35  | 0.9365 |
|            |                |    | Chr2:94071847 | -43   | 1.85  | 1.65  | 0.6653 |
|            |                |    | Chr2:94071844 | -40   | 2.52  | 2.02  | 0.3868 |
|            |                |    | Chr2:94071841 | -37   | 2.45  | 2.05  | 0.2147 |
|            |                |    | Chr2:94071838 | -34   | 2.75  | 2.37  | 0.4553 |
|            |                |    | Chr2:94071835 | -31   | 2.92  | 3.05  | 0.1250 |
|            |                |    | Chr2:94071832 | -25   | 0.407 | 3.35  | 0.1881 |
|            |                |    | Chr2:94071829 | -22   | 4.42  | 3.57  | 0.2695 |
|            |                |    | Chr2:94071823 | -17   | 3.92  | 3.75  | 0.7711 |
|            |                |    | Chr2:94071820 | -9    | 2.30  | 2.30  | 0.9999 |
| Exon 1     | +8 to +22      | 3  | Chr2:94071815 | +8    | 2.75  | 2.17  | 0.1387 |



|              |              |    |               |      |       |       |        |
|--------------|--------------|----|---------------|------|-------|-------|--------|
|              |              |    | Chr2:94071807 | +10  | 1.52  | 1.12  | 0.4610 |
|              |              |    | Chr2:94071791 | +22  | 2.17  | 1.82  | 0.5044 |
| Exon 1       | +54 to +89   | 4  | Chr2:94071789 | +54  | 9.00  | 7.67  | 0.6179 |
|              |              |    | Chr2:94071777 | +80  | 6.17  | 6.15  | 0.9933 |
|              |              |    | Chr2:94071745 | +82  | 7.10  | 6.90  | 0.9537 |
|              |              |    | Chr2:94071719 | +89  | 7.75  | 5.85  | 0.3557 |
|              |              |    | Chr2:94071717 | +91  | 8.02  | 10.15 | 0.4493 |
| 3-Downstream | +91 to +289  | 21 | Chr2:94071710 | +95  | 5.02  | 6.05  | 0.7139 |
|              |              |    | Chr2:94071708 | +98  | 9.65  | 6.42  | 0.2778 |
|              |              |    | Chr2:94071704 | +101 | 7.55  | 7.02  | 0.8615 |
|              |              |    | Chr2:94071701 | +119 | 5.62  | 4.22  | 0.6271 |
|              |              |    | Chr2:94071698 | +123 | 6.17  | 5.75  | 0.9056 |
|              |              |    | Chr2:94071680 | +126 | 7.57  | 5.65  | 0.3927 |
|              |              |    | Chr2:94071676 | +143 | 6.90  | 2.67  | 0.009* |
|              |              |    | Chr2:94071673 | +148 | 5.72  | 3.12  | 0.3041 |
|              |              |    | Chr2:94071656 | +158 | 5.30  | 6.22  | 0.7088 |
|              |              |    | Chr2:94071651 | +182 | 4.22  | 3.50  | 0.8410 |
|              |              |    | Chr2:94071608 | +224 | 13.73 | 9.16  | 0.0879 |
|              |              |    | Chr2:94071575 | +231 | 7.83  | 4.70  | 0.2943 |
|              |              |    | Chr2:94071573 | +233 | 10.52 | 4.23  | 0.1265 |
|              |              |    | Chr2:94071568 | +249 | 20.60 | 17.37 | 0.4566 |
|              |              |    | Chr2:94071566 | +257 | 30.27 | 23.23 | 0.1994 |
|              |              |    | Chr2:94071550 | +271 | 17.90 | 15.97 | 0.8298 |
|              |              |    | Chr2:94071542 | +289 | 3.27  | 1.50  | 0.009* |
| 3-Downstream | +317 to +389 | 5  | Chr2:94071528 | +317 | 14.73 | 15.13 | 0.6782 |
|              |              |    | Chr2:94071510 | +324 | 30.78 | 30.28 | 0.2715 |
|              |              |    | Chr2:94071482 | +328 | 31.43 | 32.13 | 0.7552 |
|              |              |    | Chr2:94071475 | +338 | 26.98 | 27.43 | 0.8171 |
|              |              |    | Chr2:94071471 | +389 | 13.58 | 11.58 | 0.2438 |
| 3-Downstream | +567 to +646 | 6  | Chr2:94071461 | +567 | 50.68 | 51.50 | 0.7857 |
|              |              |    | Chr2:94071410 | +587 | 39.38 | 39.98 | 0.8516 |
|              |              |    | Chr2:94071232 | +600 | 90.58 | 90.25 | 0.6806 |
|              |              |    | Chr2:94071212 | +629 | 83.48 | 82.20 | 0.5615 |
|              |              |    | Chr2:94071199 | +637 | 88.23 | 87.98 | 0.8377 |
|              |              |    | Chr2:94071170 | +646 | 90.33 | 88.73 | 0.1789 |
| 3-Downstream | +799 to +889 | 5  | Chr2:94071162 | +799 | 87.90 | 89.95 | 0.1656 |
|              |              |    | Chr2:94071153 | +818 | 39.33 | 40.63 | 0.4259 |
|              |              |    | Chr2:94071000 | +820 | 54.73 | 54.80 | 0.9832 |
|              |              |    | Chr2:94070981 | +837 | 83.30 | 83.13 | 0.8929 |
|              |              |    | Chr2:94070979 | +889 | 78.35 | 76.80 | 0.2929 |

**Table S4.** Analysis of CpG methylation of the Mir129-2 gene does not exhibit changes when comparing LC vs. MC. Cortical NPCs were cultured in either LC (5 $\mu$ M) or MC (70 $\mu$ M) for 48 hours and subjected to bisulfite conversion to evaluate methylation. A total of 119 methylation sites in the sequence 29,022,618 to 29,022,690 in chromosome 2 were analyzed, 68 CpGs 5'Downstream, 7 within Intron-1, 7 in Exon-1 and 37 in the 3'Downstream region. The CpGs sites Chr2:94071676 (+143) and Chr2:94071542 (+289) were

statistically significant ( $p=0.009$ , t-test); however, the percentage of methylation between the two groups does not represent a significant change.
